# Supplementary material
Source: publisher figshare collection journal article supplement (https://gsajournals.figshare.com/ndownloader/files/27379301)
Supplement: Supplementary file 1 [file 27379301]

## Sheet: Table S5
Supplementary Data 5. PCR-based genotyping of a set of InDels in more lines
No	Lines	InDel	Note
b0052	CIMBL4	no
b0052	CML115	no
b0052	CIMBL2	no
b0052	CML304	no
b0052	CIMBL40	no
b0052	CML121	no
b0052	CIMBL145	no
b0052	CML323	no
b0052	CML134	no
b0052	CML122	no
b0052	CIMBL114	no
b0052	CIMBL70	no
b0052	CIMBL105	no
b0052	CIMBL29	no
b0052	CIMBL69	no
b0052	CIMBL75	no
b0052	CIMBL25	no
b0052	CML171	no
b0052	CIMBL77	no
b0052	CML163	no
b0052	CIMBL141	no
b0052	CIMBL151	no
b0052	CIMBL127	no
b0052	CIMBL88	no
b0052	CML423	no
b0052	CIMBL3	no
b0052	CIMBL22	no
b0052	CML360	no
b0052	CIMBL86	no
b0052	CIMBL48	no
b0052	CML361	no
b0052	CIMBL23	no
b0052	CIMBL74	no
b0052	CML327	no
b0052	CML139	no
b0052	CIMBL133	no
b0052	CML172	no
b0052	CIMBL43	no
b0052	CIMBL83	no
b0052	CIMBL96	no
b0052	CIMBL63	no
b0052	CML189	no
b0052	CIMBL49	no
b0052	CML192	no
b0052	5213	no
b0052	Zheng653	no
b0052	ZB648	no
b0052	150	no
b0052	975-12	no
b0052	Zheng30	no
b0052	By4839	no
b0052	GEMS5	no
b0052	GEMS29	no
b0052	4F1	no
b0052	Gy386	no
b0052	By4960	no
b0052	Tian77	no
b0052	GEMS13	no
b0052	M97	no
b0052	BS16	no
b0052	GEMS18	no
b0052	GEMS62	no
b0052	By855	no
b0052	Gy462	no
b0052	Liao5263	no
b0052	HYS	no
b0052	By4944	no
b0052	07KS4	no
b0052	Si273	no
b0052	Ji846	no
b0052	238	no
b0052	JH59	no
b0052	268	no
b0052	HZS	no
b0052	W138	no
b0052	Wu109	no
b0052	CIMBL152	no
b0052	Qi205	no
b0052	Gy798	no
b0052	Z2018F	no
b0052	Mo17	no
b0052	CI7	no
b0052	HZS	no
b0052	Dan340	no
b0052	Zong31	no
b0052	CIMBL10	yes
b0052	CIMBL17	yes
b0052	CIMBL91	yes
b0052	CIMBL13	yes
b0052	By815	yes
b0052	Dan3130	yes
b0052	TY3	yes
b0052	GEMS21	yes
b0052	Sy3073	yes
b0052	IRF314	yes
b0052	GEMS19	yes
b0052	GEMS64	yes
b0052	GEMS63	yes
b0052	TY1	yes
b0052	B110	yes
b0052	TY6	yes
b0052	GEMS31	yes
b0052	By809	yes
b0052	GEMS32	yes
b0052	By813	yes
b0052	Ry713	yes
b0052	Sy1052	yes
b0052	B73	yes
b0057	CIMBL92	no
b0057	CIMBL10	no
b0057	CIMBL60	no
b0057	CIMBL4	no
b0057	CIMBL2	no
b0057	CML304	no
b0057	CIMBL40	no
b0057	CML121	no
b0057	CIMBL145	no
b0057	CML323	no
b0057	CIMBL12	no
b0057	CML69	no
b0057	CML122	no
b0057	CIMBL114	no
b0057	CIMBL70	no
b0057	CIMBL105	no
b0057	CIMBL69	no
b0057	CIMBL75	no
b0057	CIMBL25	no
b0057	CML171	no
b0057	CIMBL94	no
b0057	CIMBL28	no
b0057	CML163	no
b0057	CIMBL141	no
b0057	CIMBL151	no
b0057	CIMBL127	no
b0057	CIMBL88	no
b0057	CML423	no
b0057	CIMBL3	no
b0057	CIMBL53	no
b0057	CML360	no
b0057	CIMBL86	no
b0057	CIMBL48	no
b0057	CML361	no
b0057	CML32	no
b0057	CIMBL82	no
b0057	CIMBL17	no
b0057	CML170	no
b0057	CIMBL74	no
b0057	CML327	no
b0057	CML139	no
b0057	CIMBL91	no
b0057	CIMBL133	no
b0057	CIMBL13	no
b0057	CML172	no
b0057	CIMBL95	no
b0057	CIMBL106	no
b0057	CML496	no
b0057	CIMBL43	no
b0057	CIMBL83	no
b0057	CIMBL42	no
b0057	CIMBL96	no
b0057	CML324	no
b0057	CIMBL63	no
b0057	CML189	no
b0057	CIMBL49	no
b0057	CML192	no
b0057	By815	no
b0057	5213	no
b0057	Zheng653	no
b0057	ZB648	no
b0057	150	no
b0057	Dan3130	no
b0057	975-12	no
b0057	Zheng29	no
b0057	Zheng30	no
b0057	By4839	no
b0057	GEMS5	no
b0057	GEMS29	no
b0057	05WN230	no
b0057	TY3	no
b0057	4F1	no
b0057	Sy3073	no
b0057	Gy386	no
b0057	By4960	no
b0057	Tian77	no
b0057	GEMS37	no
b0057	IRF314	no
b0057	GEMS19	no
b0057	177	no
b0057	TY1	no
b0057	B110	no
b0057	GEMS13	no
b0057	TY6	no
b0057	M97	no
b0057	GEMS18	no
b0057	GEMS31	no
b0057	By809	no
b0057	GEMS62	no
b0057	By855	no
b0057	Gy462	no
b0057	Zheng35	no
b0057	Liao5263	no
b0057	By4944	no
b0057	07KS4	no
b0057	GEMS32	no
b0057	Si273	no
b0057	Ji846	no
b0057	238	no
b0057	JH59	no
b0057	W138	no
b0057	Wu109	no
b0057	By813	no
b0057	Ry713	no
b0057	Sy1052	no
b0057	CIMBL152	no
b0057	Gy798	no
b0057	CIMBL137	no
b0057	Z2018F	no
b0057	Mo17	no
b0057	CI7	no
b0057	K22	no
b0057	Dan340	no
b0057	Zong31	no
b0057	CML115	yes
b0057	L3180	yes
b0057	GEMS21	yes
b0057	GEMS64	yes
b0057	GEMS63	yes
b0057	HYS	yes
b0057	268	yes
b0057	HZS	yes
b0057	Qi205	yes
b0057	B73	yes
b0057	HZS	yes
b0057	CIMBL77	zhong	The detection fragment is larger than the genome without InDel and smaller than the genome with InDel
b0110	CIMBL92	no
b0110	CIMBL10	no
b0110	CIMBL60	no
b0110	CIMBL4	yes
b0110	CML115	yes
b0110	CIMBL2	no
b0110	CML304	no
b0110	CIMBL40	yes
b0110	CML121	yes
b0110	CIMBL145	yes
b0110	CML323	no
b0110	CML134	no
b0110	CIMBL12	no
b0110	CML69	no
b0110	CML122	yes
b0110	CIMBL114	no
b0110	CIMBL105	no
b0110	CIMBL29	yes
b0110	CIMBL69	no
b0110	CIMBL75	no
b0110	CIMBL25	yes
b0110	CML325	yes
b0110	CML171	no
b0110	CIMBL77	no
b0110	CIMBL94	no
b0110	CIMBL28	no
b0110	CML163	yes
b0110	CIMBL141	yes
b0110	CIMBL151	yes
b0110	CIMBL127	no
b0110	CIMBL88	no
b0110	CML423	no
b0110	CIMBL3	yes
b0110	CIMBL53	no
b0110	CIMBL22	yes
b0110	CML360	no
b0110	CIMBL86	no
b0110	CIMBL48	no
b0110	CML361	no
b0110	CML32	no
b0110	CIMBL17	no
b0110	CML170	yes
b0110	CIMBL23	yes
b0110	CIMBL74	no
b0110	CML327	yes
b0110	CIMBL91	no
b0110	CIMBL133	no
b0110	CIMBL13	yes
b0110	CML172	no
b0110	CIMBL95	no
b0110	CIMBL106	no
b0110	CML496	no
b0110	CIMBL43	yes
b0110	CIMBL42	no
b0110	CIMBL96	no
b0110	CML324	no
b0110	CIMBL63	no
b0110	CML189	yes
b0110	CIMBL49	yes
b0110	CML192	no
b0110	By815	no
b0110	5213	no
b0110	Zheng653	no
b0110	ZB648	no
b0110	150	yes
b0110	Dan3130	no
b0110	975-12	no
b0110	B111	yes
b0110	Zheng29	no
b0110	Zheng30	yes
b0110	By4839	yes
b0110	GEMS5	yes
b0110	GEMS29	yes
b0110	05WN230	yes
b0110	Wu109	no
b0110	Mo17	no
b0110	Sy1035	no
b0110	CI7	no
b0110	Ry713	no
b0110	TY3	yes
b0110	L3180	no
b0110	4F1	no
b0110	GEMS21	yes
b0110	Sy3073	no
b0110	Gy386	yes
b0110	By4960	yes
b0110	Tian77	no
b0110	SW92E114	no
b0110	GEMS37	no
b0110	IRF314	no
b0110	GEMS19	no
b0110	177	yes
b0110	GEMS64	yes
b0110	Z2018F	yes
b0110	GEMS63	yes
b0110	TY1	yes
b0110	Tie7922	no
b0110	B110	yes
b0110	GEMS13	no
b0110	Dan340	no
b0110	BS16	no
b0110	GEMS18	yes
b0110	HYS	no
b0110	K22	no
b0110	GEMS14	no
b0110	HZS	no
b0110	Gy798	no
b0222	CIMBL92	no
b0222	CIMBL60	no
b0222	CIMBL4	no
b0222	CML115	no
b0222	CIMBL2	no
b0222	CIMBL40	no
b0222	CML323	no
b0222	CML134	no
b0222	CIMBL105	no
b0222	CIMBL25	no
b0222	CML171	no
b0222	CIMBL94	no
b0222	CIMBL28	no
b0222	CIMBL151	no
b0222	CIMBL88	no
b0222	CIMBL3	no
b0222	CIMBL86	no
b0222	CIMBL48	no
b0222	CML361	no
b0222	CIMBL74	no
b0222	CIMBL91	no
b0222	CML172	no
b0222	CIMBL43	no
b0222	CIMBL83	no
b0222	CIMBL42	no
b0222	CIMBL96	no
b0222	CML324	no
b0222	CIMBL63	no
b0222	By815	no
b0222	Zheng653	no
b0222	150	no
b0222	Dan3130	no
b0222	975-12	no
b0222	Zheng30	no
b0222	Gy386	no
b0222	By4960	no
b0222	Tian77	no
b0222	By809	no
b0222	By855	no
b0222	By4944	no
b0222	07KS4	no
b0222	ZZ01	no
b0222	Si273	no
b0222	Ji846	no
b0222	238	no
b0222	W138	no
b0222	By813	no
b0222	Ry713	no
b0222	CIMBL137	no
b0222	Z2018F	no
b0222	Mo17	no
b0222	K22	no
b0222	Dan340	no
b0222	CML121	yes
b0222	CML122	yes
b0222	CML139	yes
b0222	CIMBL106	yes
b0256	CIMBL92	no
b0256	CIMBL10	no
b0256	CIMBL4	no
b0256	CML115	no
b0256	CML304	no
b0256	CML121	no
b0256	CIMBL145	no
b0256	CML134	no
b0256	CML69	no
b0256	CML122	no
b0256	CIMBL114	no
b0256	CIMBL70	no
b0256	CIMBL105	no
b0256	CIMBL29	no
b0256	CIMBL75	no
b0256	CML171	no
b0256	CML163	no
b0256	CIMBL151	no
b0256	CIMBL127	no
b0256	CIMBL88	no
b0256	CML423	no
b0256	CIMBL3	no
b0256	CIMBL53	no
b0256	CIMBL22	no
b0256	CML360	no
b0256	CIMBL48	no
b0256	CML361	no
b0256	CML32	no
b0256	CIMBL82	no
b0256	CIMBL17	no
b0256	CIMBL23	no
b0256	CIMBL74	no
b0256	CML139	no
b0256	CIMBL91	no
b0256	CIMBL133	no
b0256	CIMBL13	no
b0256	CML172	no
b0256	CIMBL95	no
b0256	CIMBL106	no
b0256	CML496	no
b0256	CIMBL43	no
b0256	CIMBL83	no
b0256	CIMBL42	no
b0256	CIMBL96	no
b0256	CML324	no
b0256	CIMBL63	no
b0256	CML189	no
b0256	CML192	no
b0256	By815	no
b0256	Zheng653	no
b0256	ZB648	no
b0256	Dan3130	no
b0256	Zheng29	no
b0256	By4839	no
b0256	GEMS29	no
b0256	05WN230	no
b0256	TY3	no
b0256	L3180	no
b0256	4F1	no
b0256	GEMS21	no
b0256	Sy3073	no
b0256	Gy386	no
b0256	Tian77	no
b0256	SW92E114	no
b0256	IRF314	no
b0256	Si273	no
b0256	Ji846	no
b0256	238	no
b0256	JH59	no
b0256	268	no
b0256	HZS	no
b0256	W138	no
b0256	Wu109	no
b0256	By813	no
b0256	Ry713	no
b0256	Sy1052	no
b0256	CIMBL152	no
b0256	Qi205	no
b0256	Gy798	no
b0256	CIMBL137	no
b0256	Z2018F	no
b0256	Mo17	no
b0256	CI7	no
b0256	HZS	no
b0256	Zong31	no
b0256	CIMBL12	yes
b0256	CIMBL25	yes
b0256	CIMBL86	yes
b0256	CIMBL49	yes
b0256	5213	yes
b0256	150	yes
b0256	975-12	yes
b0256	Zheng30	yes
b0256	By4960	yes
b0256	GEMS19	yes
b0256	GEMS64	yes
b0256	GEMS63	yes
b0256	8902	yes
b0256	B73	yes
b0256	Dan340	yes
b0256	CIMBL28	zhong	The detection fragment is larger than the genome without InDel and smaller than the genome with InDel
b0256	CML170	zhong	The detection fragment is larger than the genome without InDel and smaller than the genome with InDel
b0264	CIMBL92	no
b0264	CIMBL60	no
b0264	CML115	no
b0264	CIMBL2	no
b0264	CML304	no
b0264	CIMBL40	no
b0264	CML121	no
b0264	CML323	no
b0264	CML134	no
b0264	CIMBL12	no
b0264	CML69	no
b0264	CML122	no
b0264	CIMBL114	no
b0264	CIMBL70	no
b0264	CIMBL105	no
b0264	CIMBL29	no
b0264	CIMBL69	no
b0264	CIMBL75	no
b0264	CIMBL25	no
b0264	CML171	no
b0264	CIMBL77	no
b0264	CML163	no
b0264	CIMBL141	no
b0264	CIMBL151	no
b0264	CIMBL127	no
b0264	CIMBL88	no
b0264	CML423	no
b0264	CIMBL53	no
b0264	CIMBL22	no
b0264	CML360	no
b0264	CIMBL86	no
b0264	CML361	no
b0264	CML32	no
b0264	CIMBL82	no
b0264	CML170	no
b0264	CIMBL23	no
b0264	CML327	no
b0264	CML139	no
b0264	CIMBL91	no
b0264	CIMBL133	no
b0264	CML172	no
b0264	CIMBL95	no
b0264	CIMBL106	no
b0264	CML496	no
b0264	CIMBL43	no
b0264	CIMBL83	no
b0264	CIMBL42	no
b0264	CIMBL96	no
b0264	CML324	no
b0264	CML189	no
b0264	By815	no
b0264	Zheng653	no
b0264	ZB648	no
b0264	150	no
b0264	Dan3130	no
b0264	By4839	no
b0264	GEMS5	no
b0264	05WN230	no
b0264	4F1	no
b0264	Gy386	no
b0264	Tian77	no
b0264	IRF314	no
b0264	TY6	no
b0264	M97	no
b0264	GEMS18	no
b0264	By809	no
b0264	GEMS62	no
b0264	By855	no
b0264	Gy462	no
b0264	Si273	no
b0264	Ji846	no
b0264	JH59	no
b0264	HZS	no
b0264	Wu109	no
b0264	By813	no
b0264	Sy1052	no
b0264	CIMBL152	no
b0264	Gy798	no
b0264	Z2018F	no
b0264	Mo17	no
b0264	CI7	no
b0264	K22	no
b0264	HZS	no
b0264	Zong31	no
b0264	CIMBL10	yes
b0264	CIMBL4	yes
b0264	CIMBL145	yes
b0264	CIMBL94	yes
b0264	CIMBL3	yes
b0264	CIMBL17	yes
b0264	CIMBL13	yes
b0264	CIMBL63	yes
b0264	CIMBL49	yes
b0264	CML192	yes
b0264	5213	yes
b0264	975-12	yes
b0264	Zheng29	yes
b0264	Zheng30	yes
b0264	TY3	yes
b0264	GEMS21	yes
b0264	Sy3073	yes
b0264	GEMS19	yes
b0264	GEMS64	yes
b0264	GEMS63	yes
b0264	TY1	yes
b0264	B110	yes
b0264	GEMS13	yes
b0264	Zheng35	yes
b0264	07KS4	yes
b0264	GEMS32	yes
b0264	8902	yes
b0264	268	yes
b0264	Ry713	yes
b0264	Qi205	yes
b0264	B73	yes
b0264	Dan340	yes
b0300	CML360	da	The detection fragment is larger than the genome containing InDel
b0300	CIMBL82	da	The detection fragment is larger than the genome containing InDel
b0300	CIMBL17	da	The detection fragment is larger than the genome containing InDel
b0300	CML170	da	The detection fragment is larger than the genome containing InDel
b0300	05WN230	da	The detection fragment is larger than the genome containing InDel
b0300	Z2018F	da	The detection fragment is larger than the genome containing InDel
b0300	CIMBL10	no
b0300	CIMBL60	no
b0300	CML115	no
b0300	CIMBL2	no
b0300	CIMBL40	no
b0300	CIMBL145	no
b0300	CML134	no
b0300	CIMBL12	no
b0300	CML69	no
b0300	CML122	no
b0300	CIMBL69	no
b0300	CML325	no
b0300	CML171	no
b0300	CIMBL77	no
b0300	CML163	no
b0300	CIMBL141	no
b0300	CIMBL151	no
b0300	CML423	no
b0300	CIMBL53	no
b0300	CIMBL48	no
b0300	CML361	no
b0300	CML32	no
b0300	CML139	no
b0300	CIMBL13	no
b0300	CML172	no
b0300	CIMBL43	no
b0300	CIMBL83	no
b0300	CIMBL42	no
b0300	CML324	no
b0300	CML189	no
b0300	CML192	no
b0300	Zheng653	no
b0300	150	no
b0300	Zheng29	no
b0300	Zheng30	no
b0300	GEMS5	no
b0300	Sy1035	no
b0300	L3180	no
b0300	GEMS21	no
b0300	IRF314	no
b0300	GEMS64	no
b0300	GEMS63	no
b0300	B110	no
b0300	GEMS13	no
b0300	By809	no
b0300	GEMS62	no
b0300	Gy462	no
b0300	By4944	no
b0300	07KS4	no
b0300	GEMS14	no
b0300	Si273	no
b0300	238	no
b0300	Wu109	no
b0300	CIMBL137	no
b0300	B73	no
b0300	K22	no
b0300	CIMBL92	yes
b0300	CIMBL4	yes
b0300	CML304	yes
b0300	CML121	yes
b0300	CIMBL70	yes
b0300	CIMBL105	yes
b0300	CIMBL75	yes
b0300	CIMBL94	yes
b0300	CIMBL88	yes
b0300	CIMBL3	yes
b0300	CIMBL86	yes
b0300	CIMBL23	yes
b0300	CIMBL74	yes
b0300	CML327	yes
b0300	CIMBL91	yes
b0300	CIMBL95	yes
b0300	CIMBL106	yes
b0300	CML496	yes
b0300	CIMBL96	yes
b0300	CIMBL63	yes
b0300	CIMBL49	yes
b0300	By815	yes
b0300	5213	yes
b0300	ZB648	yes
b0300	Dan3130	yes
b0300	975-12	yes
b0300	By4839	yes
b0300	TY3	yes
b0300	4F1	yes
b0300	Sy3073	yes
b0300	Gy386	yes
b0300	By4960	yes
b0300	Tian77	yes
b0300	GEMS37	yes
b0300	GEMS19	yes
b0300	TY1	yes
b0300	TY6	yes
b0300	BS16	yes
b0300	GEMS18	yes
b0300	By855	yes
b0300	HYS	yes
b0300	GEMS32	yes
b0300	Ji846	yes
b0300	JH59	yes
b0300	8902	yes
b0300	268	yes
b0300	HZS	yes
b0300	By813	yes
b0300	Ry713	yes
b0300	Sy1052	yes
b0300	Qi205	yes
b0300	Gy798	yes
b0300	Mo17	yes
b0300	CI7	yes
b0300	HZS	yes
b0300	Dan340	yes
b0300	Zong31	yes
b0344	CIMBL2	da	The detection fragment is larger than the genome containing InDel
b0344	CIMBL77	da	The detection fragment is larger than the genome containing InDel
b0344	CIMBL133	da	The detection fragment is larger than the genome containing InDel
b0344	CIMBL63	da	The detection fragment is larger than the genome containing InDel
b0344	5213	da	The detection fragment is larger than the genome containing InDel
b0344	ZB648	da	The detection fragment is larger than the genome containing InDel
b0344	GEMS5	da	The detection fragment is larger than the genome containing InDel
b0344	GEMS29	da	The detection fragment is larger than the genome containing InDel
b0344	BS16	da	The detection fragment is larger than the genome containing InDel
b0344	HZS	da	The detection fragment is larger than the genome containing InDel
b0344	W138	da	The detection fragment is larger than the genome containing InDel
b0344	Wu109	da	The detection fragment is larger than the genome containing InDel
b0344	HZS	da	The detection fragment is larger than the genome containing InDel
b0344	CIMBL92	no
b0344	CIMBL10	no
b0344	CIMBL60	no
b0344	CIMBL4	no
b0344	CML115	no
b0344	CML304	no
b0344	CIMBL40	no
b0344	CIMBL145	no
b0344	CML323	no
b0344	CML134	no
b0344	CIMBL12	no
b0344	CML69	no
b0344	CML122	no
b0344	CIMBL114	no
b0344	CIMBL105	no
b0344	CIMBL69	no
b0344	CIMBL75	no
b0344	CIMBL25	no
b0344	CML171	no
b0344	CIMBL28	no
b0344	CML163	no
b0344	CIMBL141	no
b0344	CIMBL151	no
b0344	CIMBL127	no
b0344	CML423	no
b0344	CIMBL3	no
b0344	CIMBL53	no
b0344	CML360	no
b0344	CIMBL86	no
b0344	CIMBL48	no
b0344	CML361	no
b0344	CML32	no
b0344	CIMBL82	no
b0344	CIMBL17	no
b0344	CML170	no
b0344	CIMBL23	no
b0344	CIMBL74	no
b0344	CML139	no
b0344	CIMBL91	no
b0344	CIMBL13	no
b0344	CML172	no
b0344	CIMBL95	no
b0344	CIMBL106	no
b0344	CML496	no
b0344	CIMBL43	no
b0344	CIMBL83	no
b0344	CIMBL96	no
b0344	CML324	no
b0344	CML189	no
b0344	CML192	no
b0344	By815	no
b0344	Zheng653	no
b0344	150	no
b0344	975-12	no
b0344	TY1	no
b0344	B110	no
b0344	TY6	no
b0344	M97	no
b0344	GEMS18	no
b0344	GEMS31	no
b0344	By809	no
b0344	GEMS62	no
b0344	By855	no
b0344	Gy462	no
b0344	Liao5263	no
b0344	By4944	no
b0344	07KS4	no
b0344	GEMS32	no
b0344	CML121	yes
b0344	CIMBL94	yes
b0344	CIMBL88	yes
b0344	CML327	yes
b0344	CIMBL42	yes
b0344	CIMBL49	yes
b0344	Dan3130	yes
b0344	Zheng30	yes
b0344	4F1	yes
b0344	GEMS21	yes
b0344	GEMS64	yes
b0344	GEMS63	yes
b0344	GEMS13	yes
b0344	268	yes
b0344	CIMBL152	yes
b0344	CIMBL137	yes
b0344	Mo17	yes
b0380	CIMBL92	no
b0380	CIMBL60	no
b0380	CIMBL4	no
b0380	CIMBL2	no
b0380	CML304	no
b0380	CIMBL40	no
b0380	CML121	no
b0380	CIMBL145	no
b0380	CML323	no
b0380	CML134	no
b0380	CIMBL12	no
b0380	CML69	no
b0380	CML122	no
b0380	CIMBL114	no
b0380	CIMBL70	no
b0380	CIMBL105	no
b0380	CIMBL29	no
b0380	CIMBL69	no
b0380	CIMBL75	no
b0380	CIMBL25	no
b0380	CIMBL77	no
b0380	CIMBL28	no
b0380	CML163	no
b0380	CIMBL141	no
b0380	CIMBL151	no
b0380	CIMBL88	no
b0380	CML423	no
b0380	CIMBL3	no
b0380	CIMBL22	no
b0380	CML360	no
b0380	CIMBL86	no
b0380	CIMBL48	no
b0380	CML361	no
b0380	CML32	no
b0380	CIMBL82	no
b0380	CIMBL17	no
b0380	CML170	no
b0380	CIMBL23	no
b0380	CIMBL74	no
b0380	CML139	no
b0380	CIMBL91	no
b0380	CIMBL133	no
b0380	CIMBL13	no
b0380	CIMBL95	no
b0380	CIMBL106	no
b0380	CML496	no
b0380	CIMBL43	no
b0380	CIMBL42	no
b0380	CML324	no
b0380	CIMBL63	no
b0380	CML189	no
b0380	CML192	no
b0380	By815	no
b0380	5213	no
b0380	Zheng653	no
b0380	ZB648	no
b0380	150	no
b0380	975-12	no
b0380	Zheng29	no
b0380	Zheng30	no
b0380	By4839	no
b0380	GEMS5	no
b0380	05WN230	no
b0380	GEMS21	no
b0380	Sy3073	no
b0380	Gy386	no
b0380	By4960	no
b0380	Tian77	no
b0380	SW92E114	no
b0380	GEMS37	no
b0380	IRF314	no
b0380	177	no
b0380	GEMS64	no
b0380	GEMS63	no
b0380	B110	no
b0380	M97	no
b0380	BS16	no
b0380	GEMS18	no
b0380	By809	no
b0380	GEMS62	no
b0380	Gy462	no
b0380	By4944	no
b0380	07KS4	no
b0380	ZZ01	no
b0380	GEMS32	no
b0380	Si273	no
b0380	238	no
b0380	JH59	no
b0380	8902	no
b0380	268	no
b0380	HZS	no
b0380	Wu109	no
b0380	By813	no
b0380	Ry713	no
b0380	Sy1052	no
b0380	CIMBL152	no
b0380	Gy798	no
b0380	Z2018F	no
b0380	B73	no
b0380	CI7	no
b0380	K22	no
b0380	HZS	no
b0380	Dan340	no
b0380	CIMBL10	yes
b0380	CML171	yes
b0380	CIMBL53	yes
b0380	CML327	yes
b0380	CIMBL49	yes
b0424	CIMBL92	no
b0424	CIMBL60	no
b0424	CIMBL4	no
b0424	CIMBL2	no
b0424	CML304	no
b0424	CML121	no
b0424	CIMBL145	no
b0424	CML323	no
b0424	CIMBL12	no
b0424	CML69	no
b0424	CIMBL70	no
b0424	CIMBL29	no
b0424	CIMBL69	no
b0424	CIMBL75	no
b0424	CML171	no
b0424	CIMBL77	no
b0424	CIMBL94	no
b0424	CIMBL151	no
b0424	CIMBL127	no
b0424	CIMBL3	no
b0424	CIMBL53	no
b0424	CIMBL22	no
b0424	CML360	no
b0424	CIMBL86	no
b0424	CIMBL23	no
b0424	CIMBL74	no
b0424	CML327	no
b0424	CIMBL91	no
b0424	CIMBL133	no
b0424	CIMBL13	no
b0424	CML172	no
b0424	CIMBL106	no
b0424	CML496	no
b0424	CIMBL42	no
b0424	CIMBL96	no
b0424	CIMBL49	no
b0424	By815	no
b0424	5213	no
b0424	Zheng653	no
b0424	ZB648	no
b0424	150	no
b0424	Dan3130	no
b0424	975-12	no
b0424	Zheng30	no
b0424	By4839	no
b0424	GEMS5	no
b0424	GEMS29	no
b0424	05WN230	no
b0424	TY3	no
b0424	GEMS21	no
b0424	Sy3073	no
b0424	Gy386	no
b0424	By4960	no
b0424	Tian77	no
b0424	GEMS19	no
b0424	GEMS64	no
b0424	GEMS63	no
b0424	BS16	no
b0424	GEMS18	no
b0424	By809	no
b0424	GEMS62	no
b0424	By855	no
b0424	Gy462	no
b0424	By4944	no
b0424	07KS4	no
b0424	ZZ01	no
b0424	Si273	no
b0424	Ji846	no
b0424	8902	no
b0424	268	no
b0424	HZS	no
b0424	W138	no
b0424	Wu109	no
b0424	By813	no
b0424	Ry713	no
b0424	Qi205	no
b0424	Gy798	no
b0424	CIMBL137	no
b0424	Mo17	no
b0424	K22	no
b0424	HZS	no
b0424	Zong31	no
b0424	CIMBL10	yes
b0424	CML115	yes
b0424	CIMBL40	yes
b0424	CML122	yes
b0424	CIMBL114	yes
b0424	CIMBL105	yes
b0424	CIMBL25	yes
b0424	CML325	yes
b0424	CIMBL28	yes
b0424	CML163	yes
b0424	CIMBL141	yes
b0424	CIMBL88	yes
b0424	CML423	yes
b0424	CIMBL48	yes
b0424	CML361	yes
b0424	CML32	yes
b0424	CIMBL82	yes
b0424	CIMBL17	yes
b0424	CML170	yes
b0424	CML139	yes
b0424	CIMBL95	yes
b0424	CIMBL83	yes
b0424	CIMBL63	yes
b0424	CML189	yes
b0424	CML192	yes
b0424	Zheng29	yes
b0424	4F1	yes
b0424	IRF314	yes
b0424	TY1	yes
b0424	B110	yes
b0424	GEMS13	yes
b0424	TY6	yes
b0424	M97	yes
b0424	Liao5263	yes
b0424	HYS	yes
b0424	GEMS32	yes
b0424	238	yes
b0424	JH59	yes
b0424	Sy1052	yes
b0424	CIMBL152	yes
b0424	B73	yes
b0424	CI7	yes
b0424	Dan340	yes
b0436	CML304	no
b0436	CIMBL40	no
b0436	CML69	no
b0436	CIMBL114	no
b0436	CIMBL70	no
b0436	CIMBL105	no
b0436	CML171	no
b0436	CML163	no
b0436	CIMBL151	no
b0436	CIMBL127	no
b0436	CIMBL3	no
b0436	CIMBL53	no
b0436	CIMBL22	no
b0436	CML360	no
b0436	CIMBL17	no
b0436	CIMBL74	no
b0436	CML327	no
b0436	CIMBL91	no
b0436	CIMBL133	no
b0436	CIMBL95	no
b0436	CML496	no
b0436	CIMBL43	no
b0436	CIMBL42	no
b0436	CIMBL96	no
b0436	CML324	no
b0436	CML189	no
b0436	By815	no
b0436	Dan3130	no
b0436	975-12	no
b0436	Zheng30	no
b0436	By4839	no
b0436	GEMS29	no
b0436	05WN230	no
b0436	TY3	no
b0436	L3180	no
b0436	Gy386	no
b0436	By4960	no
b0436	IRF314	no
b0436	GEMS19	no
b0436	TY1	no
b0436	GEMS13	no
b0436	TY6	no
b0436	By809	no
b0436	By855	no
b0436	Gy462	no
b0436	By4944	no
b0436	07KS4	no
b0436	Si273	no
b0436	238	no
b0436	JH59	no
b0436	W138	no
b0436	Wu109	no
b0436	By813	no
b0436	Ry713	no
b0436	Sy1052	no
b0436	Qi205	no
b0436	Gy798	no
b0436	Mo17	no
b0436	K22	no
b0436	Dan340	no
b0436	Zheng29	yes
b0436	GEMS64	yes
b0436	B110	yes
b0436	Ji846	yes
b0436	8902	yes
b0436	B73	yes
b0436	CI7	yes
b0436	CIMBL12	zhong	The detection fragment is larger than the genome without InDel and smaller than the genome with InDel
b0436	CIMBL82	zhong	The detection fragment is larger than the genome without InDel and smaller than the genome with InDel
b0509	CIMBL92	no
b0509	CIMBL60	no
b0509	CIMBL4	no
b0509	CML115	no
b0509	CIMBL2	no
b0509	CML304	no
b0509	CIMBL40	no
b0509	CIMBL145	no
b0509	CML323	no
b0509	CML134	no
b0509	CML69	no
b0509	CML122	no
b0509	CIMBL114	no
b0509	CIMBL70	no
b0509	CIMBL105	no
b0509	CIMBL69	no
b0509	CIMBL75	no
b0509	CIMBL25	no
b0509	CML171	no
b0509	CIMBL77	no
b0509	CIMBL94	no
b0509	CIMBL28	no
b0509	CML163	no
b0509	CIMBL141	no
b0509	CIMBL151	no
b0509	CIMBL127	no
b0509	CIMBL88	no
b0509	CML423	no
b0509	CIMBL3	no
b0509	CIMBL53	no
b0509	CIMBL22	no
b0509	CML360	no
b0509	CIMBL48	no
b0509	CML361	no
b0509	CML32	no
b0509	CIMBL82	no
b0509	CIMBL17	no
b0509	CML170	no
b0509	CIMBL23	no
b0509	CIMBL74	no
b0509	CML327	no
b0509	CML139	no
b0509	CIMBL91	no
b0509	CIMBL133	no
b0509	CIMBL13	no
b0509	CML172	no
b0509	CIMBL95	no
b0509	CIMBL106	no
b0509	CML496	no
b0509	CIMBL43	no
b0509	CIMBL83	no
b0509	CIMBL42	no
b0509	CIMBL96	no
b0509	CML324	no
b0509	CIMBL63	no
b0509	CML189	no
b0509	CIMBL49	no
b0509	CML192	no
b0509	By815	no
b0509	Zheng653	no
b0509	ZB648	no
b0509	Dan3130	no
b0509	975-12	no
b0509	Zheng29	no
b0509	Zheng30	no
b0509	GEMS29	no
b0509	05WN230	no
b0509	TY3	no
b0509	L3180	no
b0509	4F1	no
b0509	Sy3073	no
b0509	Gy386	no
b0509	By4960	no
b0509	Tian77	no
b0509	GEMS37	no
b0509	IRF314	no
b0509	GEMS19	no
b0509	Gy462	no
b0509	By4944	no
b0509	07KS4	no
b0509	GEMS14	no
b0509	GEMS32	no
b0509	Ji846	no
b0509	238	no
b0509	JH59	no
b0509	8902	no
b0509	268	no
b0509	HZS	no
b0509	W138	no
b0509	Wu109	no
b0509	By813	no
b0509	Ry713	no
b0509	Sy1052	no
b0509	CIMBL152	no
b0509	Qi205	no
b0509	Gy798	no
b0509	CIMBL137	no
b0509	Z2018F	no
b0509	Mo17	no
b0509	CI7	no
b0509	K22	no
b0509	HZS	no
b0509	Dan340	no
b0509	Zong31	no
b0509	Si273	yes
b0509	B73	yes
b0597	CIMBL4	no
b0597	CML115	no
b0597	CML304	no
b0597	CIMBL40	no
b0597	CML121	no
b0597	CML134	no
b0597	CML69	no
b0597	CIMBL70	no
b0597	CIMBL105	no
b0597	CIMBL75	no
b0597	CIMBL28	no
b0597	CIMBL3	no
b0597	CML32	no
b0597	CIMBL82	no
b0597	CML170	no
b0597	CIMBL74	no
b0597	CIMBL91	no
b0597	CIMBL63	no
b0597	CML189	no
b0597	CML192	no
b0597	5213	no
b0597	975-12	no
b0597	B111	no
b0597	Zheng29	no
b0597	GEMS5	no
b0597	TY3	no
b0597	L3180	no
b0597	GEMS21	no
b0597	GEMS19	no
b0597	GEMS64	no
b0597	GEMS63	no
b0597	TY1	no
b0597	GEMS13	no
b0597	TY6	no
b0597	GEMS18	no
b0597	GEMS62	no
b0597	Zheng35	no
b0597	07KS4	no
b0597	GEMS11	no
b0597	8902	no
b0597	Wu109	no
b0597	CIMBL152	no
b0597	CIMBL137	no
b0597	Z2018F	no
b0597	B73	no
b0597	CIMBL92	yes
b0597	CIMBL10	yes
b0597	CIMBL60	yes
b0597	CIMBL2	yes
b0597	CIMBL145	yes
b0597	CML323	yes
b0597	CIMBL12	yes
b0597	CML122	yes
b0597	CIMBL114	yes
b0597	CIMBL29	yes
b0597	CIMBL69	yes
b0597	CIMBL77	yes
b0597	CIMBL94	yes
b0597	CML163	yes
b0597	CIMBL141	yes
b0597	CIMBL127	yes
b0597	CIMBL88	yes
b0597	CML423	yes
b0597	CIMBL22	yes
b0597	CML360	yes
b0597	CIMBL86	yes
b0597	CIMBL48	yes
b0597	CML361	yes
b0597	CIMBL17	yes
b0597	CIMBL23	yes
b0597	CML327	yes
b0597	CML139	yes
b0597	CIMBL133	yes
b0597	CIMBL13	yes
b0597	CIMBL95	yes
b0597	CML496	yes
b0597	CIMBL42	yes
b0597	CIMBL96	yes
b0597	CML324	yes
b0597	CIMBL49	yes
b0597	By815	yes
b0597	Zheng653	yes
b0597	ZB648	yes
b0597	150	yes
b0597	Dan3130	yes
b0597	Zheng30	yes
b0597	By4839	yes
b0597	GEMS29	yes
b0597	05WN230	yes
b0597	4F1	yes
b0597	Sy3073	yes
b0597	Gy386	yes
b0597	By4960	yes
b0597	Tian77	yes
b0597	GEMS37	yes
b0597	IRF314	yes
b0597	B110	yes
b0597	BS16	yes
b0597	By809	yes
b0597	By855	yes
b0597	Gy462	yes
b0597	Liao5263	yes
b0597	HYS	yes
b0597	By4944	yes
b0597	GEMS32	yes
b0597	Si273	yes
b0597	Ji846	yes
b0597	238	yes
b0597	JH59	yes
b0597	268	yes
b0597	HZS	yes
b0597	W138	yes
b0597	By813	yes
b0597	Ry713	yes
b0597	Sy1052	yes
b0597	Qi205	yes
b0597	Gy798	yes
b0597	Mo17	yes
b0597	CI7	yes
b0597	K22	yes
b0597	HZS	yes
b0597	Dan340	yes
b0597	Zong31	yes
b0713	CIMBL10	no
b0713	CIMBL60	no
b0713	CML304	no
b0713	CIMBL145	no
b0713	CIMBL12	no
b0713	CIMBL25	no
b0713	CIMBL28	no
b0713	CIMBL151	no
b0713	CIMBL88	no
b0713	CML423	no
b0713	CIMBL17	no
b0713	CML170	no
b0713	CIMBL13	no
b0713	CIMBL43	no
b0713	CIMBL83	no
b0713	CIMBL49	no
b0713	B111	no
b0713	Zheng30	no
b0713	GEMS5	no
b0713	L3180	no
b0713	GEMS21	no
b0713	Gy386	no
b0713	By4960	no
b0713	Tian77	no
b0713	GEMS19	no
b0713	177	no
b0713	GEMS64	no
b0713	GEMS63	no
b0713	Gy462	no
b0713	By4944	no
b0713	07KS4	no
b0713	8902	no
b0713	Z2018F	no
b0713	B73	no
b0713	CIMBL92	yes
b0713	CIMBL4	yes
b0713	CML115	yes
b0713	CIMBL2	yes
b0713	CIMBL40	yes
b0713	CML121	yes
b0713	CML323	yes
b0713	CML134	yes
b0713	CML69	yes
b0713	CML122	yes
b0713	CIMBL114	yes
b0713	CIMBL70	yes
b0713	CIMBL105	yes
b0713	CIMBL29	yes
b0713	CIMBL69	yes
b0713	CIMBL75	yes
b0713	CML171	yes
b0713	CIMBL77	yes
b0713	CIMBL94	yes
b0713	CML163	yes
b0713	CIMBL141	yes
b0713	CIMBL127	yes
b0713	CIMBL3	yes
b0713	CIMBL53	yes
b0713	CIMBL22	yes
b0713	CML360	yes
b0713	CIMBL86	yes
b0713	CIMBL48	yes
b0713	CML361	yes
b0713	CML32	yes
b0713	CIMBL82	yes
b0713	CIMBL23	yes
b0713	CIMBL74	yes
b0713	CML327	yes
b0713	CML139	yes
b0713	CIMBL91	yes
b0713	CIMBL133	yes
b0713	CML172	yes
b0713	CIMBL95	yes
b0713	CIMBL106	yes
b0713	CML496	yes
b0713	CIMBL42	yes
b0713	CIMBL96	yes
b0713	CML324	yes
b0713	CIMBL63	yes
b0713	CML189	yes
b0713	CML192	yes
b0713	By815	yes
b0713	5213	yes
b0713	Zheng653	yes
b0713	ZB648	yes
b0713	150	yes
b0713	Dan3130	yes
b0713	975-12	yes
b0713	Zheng29	yes
b0713	By4839	yes
b0713	GEMS29	yes
b0713	05WN230	yes
b0713	TY3	yes
b0713	4F1	yes
b0713	Sy3073	yes
b0713	GEMS37	yes
b0713	IRF314	yes
b0713	TY1	yes
b0713	Tie7922	yes
b0713	B110	yes
b0713	TY6	yes
b0713	BS16	yes
b0713	GEMS31	yes
b0713	By809	yes
b0713	GEMS62	yes
b0713	By855	yes
b0713	Zheng35	yes
b0713	Liao5263	yes
b0713	HYS	yes
b0713	GEMS11	yes
b0713	GEMS32	yes
b0713	Si273	yes
b0713	Ji846	yes
b0713	238	yes
b0713	JH59	yes
b0713	268	yes
b0713	HZS	yes
b0713	W138	yes
b0713	Wu109	yes
b0713	By813	yes
b0713	Ry713	yes
b0713	Sy1052	yes
b0713	CIMBL152	yes
b0713	Qi205	yes
b0713	Gy798	yes
b0713	CIMBL137	yes
b0713	Mo17	yes
b0713	CI7	yes
b0713	K22	yes
b0713	HZS	yes
b0713	Dan340	yes
b0713	Zong31	yes
b0791	CIMBL92	no
b0791	CIMBL60	no
b0791	CIMBL4	no
b0791	CML115	no
b0791	CIMBL2	no
b0791	CML304	no
b0791	CIMBL40	no
b0791	CML121	no
b0791	CML323	no
b0791	CML134	no
b0791	CIMBL12	no
b0791	CML69	no
b0791	CML122	no
b0791	CIMBL114	no
b0791	CIMBL70	no
b0791	CIMBL105	no
b0791	CIMBL69	no
b0791	CIMBL75	no
b0791	CIMBL25	no
b0791	CML171	no
b0791	CIMBL77	no
b0791	CIMBL94	no
b0791	CIMBL28	no
b0791	CML163	no
b0791	CIMBL151	no
b0791	CIMBL127	no
b0791	CIMBL88	no
b0791	CML423	no
b0791	CIMBL3	no
b0791	CIMBL53	no
b0791	CIMBL22	no
b0791	CML360	no
b0791	CIMBL86	no
b0791	CIMBL48	no
b0791	CML361	no
b0791	CML32	no
b0791	CIMBL82	no
b0791	CIMBL17	no
b0791	CML170	no
b0791	CIMBL23	no
b0791	CIMBL74	no
b0791	CML327	no
b0791	CML139	no
b0791	CIMBL91	no
b0791	CIMBL133	no
b0791	CML172	no
b0791	CIMBL95	no
b0791	CIMBL106	no
b0791	CML496	no
b0791	CIMBL43	no
b0791	CIMBL83	no
b0791	CIMBL42	no
b0791	CIMBL96	no
b0791	CML324	no
b0791	CIMBL63	no
b0791	CML189	no
b0791	CIMBL49	no
b0791	CML192	no
b0791	By815	no
b0791	Zheng653	no
b0791	ZB648	no
b0791	150	no
b0791	975-12	no
b0791	Zheng29	no
b0791	Zheng30	no
b0791	By4839	no
b0791	GEMS29	no
b0791	05WN230	no
b0791	TY3	no
b0791	4F1	no
b0791	Sy3073	no
b0791	Gy386	no
b0791	By4960	no
b0791	Tian77	no
b0791	IRF314	no
b0791	GEMS19	no
b0791	GEMS63	no
b0791	TY1	no
b0791	GEMS13	no
b0791	TY6	no
b0791	BS16	no
b0791	GEMS18	no
b0791	By855	no
b0791	Gy462	no
b0791	HYS	no
b0791	By4944	no
b0791	ZZ01	no
b0791	GEMS32	no
b0791	Si273	no
b0791	Ji846	no
b0791	238	no
b0791	JH59	no
b0791	HZS	no
b0791	W138	no
b0791	Wu109	no
b0791	By813	no
b0791	Ry713	no
b0791	Sy1052	no
b0791	CIMBL152	no
b0791	Qi205	no
b0791	Gy798	no
b0791	CIMBL137	no
b0791	Z2018F	no
b0791	Mo17	no
b0791	CI7	no
b0791	HZS	no
b0791	Dan340	no
b0791	Zong31	no
b0791	CIMBL10	yes
b0791	CIMBL145	yes
b0791	CIMBL141	yes
b0791	CIMBL13	yes
b0791	5213	yes
b0791	GEMS5	yes
b0791	GEMS21	yes
b0791	GEMS64	yes
b0791	B110	yes
b0791	By809	yes
b0791	GEMS62	yes
b0791	07KS4	yes
b0791	8902	yes
b0791	268	yes
b0791	B73	yes
b0791	K22	yes
b1122	CIMBL92	no
b1122	CIMBL10	no
b1122	CIMBL60	no
b1122	CIMBL4	no
b1122	CIMBL2	no
b1122	CML304	no
b1122	CIMBL40	no
b1122	CIMBL12	no
b1122	CIMBL105	no
b1122	CIMBL75	no
b1122	CML171	no
b1122	CIMBL77	no
b1122	CIMBL94	no
b1122	CIMBL22	no
b1122	CML360	no
b1122	CIMBL86	no
b1122	CML361	no
b1122	CML32	no
b1122	CIMBL82	no
b1122	CML327	no
b1122	CIMBL133	no
b1122	CML172	no
b1122	CML496	no
b1122	CIMBL96	no
b1122	CML324	no
b1122	CIMBL63	no
b1122	CML189	no
b1122	CIMBL49	no
b1122	CML192	no
b1122	5213	no
b1122	150	no
b1122	975-12	no
b1122	Zheng29	no
b1122	Zheng30	no
b1122	GEMS5	no
b1122	GEMS29	no
b1122	TY3	no
b1122	GEMS21	no
b1122	Sy3073	no
b1122	Gy386	no
b1122	Tian77	no
b1122	GEMS19	no
b1122	177	no
b1122	GEMS64	no
b1122	GEMS63	no
b1122	TY1	no
b1122	BS16	no
b1122	GEMS18	no
b1122	By809	no
b1122	GEMS62	no
b1122	Gy462	no
b1122	07KS4	no
b1122	ZZ01	no
b1122	GEMS3	no
b1122	GEMS14	no
b1122	GEMS32	no
b1122	238	no
b1122	8902	no
b1122	HZS	no
b1122	By813	no
b1122	Sy1052	no
b1122	Gy798	no
b1122	Z2018F	no
b1122	B73	no
b1122	K22	no
b1122	HZS	no
b1122	Dan340	no
b1122	Zong31	no
b1122	CML115	yes
b1122	CML121	yes
b1122	CIMBL145	yes
b1122	CML134	yes
b1122	CML122	yes
b1122	CIMBL114	yes
b1122	CML325	yes
b1122	CML163	yes
b1122	CIMBL141	yes
b1122	CIMBL151	yes
b1122	CIMBL127	yes
b1122	CML139	yes
b1122	CIMBL13	yes
b1122	CIMBL43	yes
b1122	ZB648	yes
b1122	Dan3130	yes
b1122	B111	yes
b1122	By4839	yes
b1122	4F1	yes
b1122	By4960	yes
b1122	IRF314	yes
b1122	B110	yes
b1122	By855	yes
b1122	Si273	yes
b1122	Ji846	yes
b1122	JH59	yes
b1122	268	yes
b1122	Ry713	yes
b1122	CIMBL152	yes
b1122	Qi205	yes
b1122	Mo17	yes
b1217	CIMBL92	no
b1217	CIMBL60	no
b1217	CIMBL4	no
b1217	CML115	no
b1217	CIMBL2	no
b1217	CML304	no
b1217	CIMBL40	no
b1217	CML121	no
b1217	CML134	no
b1217	CIMBL12	no
b1217	CML69	no
b1217	CML122	no
b1217	CIMBL114	no
b1217	CIMBL29	no
b1217	CIMBL69	no
b1217	CIMBL75	no
b1217	CIMBL25	no
b1217	CML171	no
b1217	CIMBL77	no
b1217	CIMBL28	no
b1217	CML163	no
b1217	CIMBL141	no
b1217	CIMBL151	no
b1217	CIMBL127	no
b1217	CML423	no
b1217	CIMBL3	no
b1217	CIMBL53	no
b1217	CIMBL48	no
b1217	CML32	no
b1217	CIMBL82	no
b1217	CIMBL17	no
b1217	CML170	no
b1217	CIMBL74	no
b1217	CML327	no
b1217	CML139	no
b1217	CIMBL91	no
b1217	CIMBL13	no
b1217	CML172	no
b1217	CIMBL95	no
b1217	CML496	no
b1217	CIMBL43	no
b1217	CIMBL83	no
b1217	CIMBL42	no
b1217	CML324	no
b1217	CIMBL63	no
b1217	CML189	no
b1217	CIMBL49	no
b1217	CML192	no
b1217	By815	no
b1217	Zheng653	no
b1217	ZB648	no
b1217	150	no
b1217	Dan3130	no
b1217	975-12	no
b1217	Zheng29	no
b1217	Zheng30	no
b1217	By4839	no
b1217	05WN230	no
b1217	TY3	no
b1217	L3180	no
b1217	4F1	no
b1217	GEMS21	no
b1217	Sy3073	no
b1217	By4960	no
b1217	Tian77	no
b1217	GEMS37	no
b1217	IRF314	no
b1217	GEMS19	no
b1217	177	no
b1217	GEMS64	no
b1217	GEMS63	no
b1217	B110	no
b1217	GEMS18	no
b1217	By809	no
b1217	GEMS62	no
b1217	By855	no
b1217	Gy462	no
b1217	By4944	no
b1217	07KS4	no
b1217	ZZ01	no
b1217	GEMS32	no
b1217	Si273	no
b1217	238	no
b1217	8902	no
b1217	268	no
b1217	By813	no
b1217	Ry713	no
b1217	CIMBL152	no
b1217	Qi205	no
b1217	Gy798	no
b1217	CIMBL137	no
b1217	Z2018F	no
b1217	B73	no
b1217	CI7	no
b1217	K22	no
b1217	Zong31	no
b1217	CIMBL145	yes
b1217	GEMS29	yes
b1217	Ji846	yes
b1217	JH59	yes
b1217	Sy1052	yes
b1217	Mo17	yes
b1217	Dan340	yes
b1243	CIMBL92	xiao	The detection fragment is smaller than the genome without InDel
b1243	CIMBL60	xiao	The detection fragment is smaller than the genome without InDel
b1243	CIMBL4	xiao	The detection fragment is smaller than the genome without InDel
b1243	CML115	xiao	The detection fragment is smaller than the genome without InDel
b1243	CIMBL2	xiao	The detection fragment is smaller than the genome without InDel
b1243	CML304	xiao	The detection fragment is smaller than the genome without InDel
b1243	CIMBL12	xiao	The detection fragment is smaller than the genome without InDel
b1243	CIMBL114	xiao	The detection fragment is smaller than the genome without InDel
b1243	CIMBL105	xiao	The detection fragment is smaller than the genome without InDel
b1243	CIMBL69	xiao	The detection fragment is smaller than the genome without InDel
b1243	CIMBL77	xiao	The detection fragment is smaller than the genome without InDel
b1243	CML163	xiao	The detection fragment is smaller than the genome without InDel
b1243	CIMBL127	xiao	The detection fragment is smaller than the genome without InDel
b1243	CIMBL88	xiao	The detection fragment is smaller than the genome without InDel
b1243	CIMBL3	xiao	The detection fragment is smaller than the genome without InDel
b1243	CIMBL53	xiao	The detection fragment is smaller than the genome without InDel
b1243	CML360	xiao	The detection fragment is smaller than the genome without InDel
b1243	CIMBL86	xiao	The detection fragment is smaller than the genome without InDel
b1243	CIMBL48	xiao	The detection fragment is smaller than the genome without InDel
b1243	CML32	xiao	The detection fragment is smaller than the genome without InDel
b1243	CIMBL82	xiao	The detection fragment is smaller than the genome without InDel
b1243	CIMBL17	xiao	The detection fragment is smaller than the genome without InDel
b1243	CML327	xiao	The detection fragment is smaller than the genome without InDel
b1243	CIMBL91	xiao	The detection fragment is smaller than the genome without InDel
b1243	CIMBL133	xiao	The detection fragment is smaller than the genome without InDel
b1243	CIMBL13	xiao	The detection fragment is smaller than the genome without InDel
b1243	CIMBL106	xiao	The detection fragment is smaller than the genome without InDel
b1243	CML496	xiao	The detection fragment is smaller than the genome without InDel
b1243	CIMBL83	xiao	The detection fragment is smaller than the genome without InDel
b1243	CIMBL96	xiao	The detection fragment is smaller than the genome without InDel
b1243	CIMBL63	xiao	The detection fragment is smaller than the genome without InDel
b1243	CIMBL49	xiao	The detection fragment is smaller than the genome without InDel
b1243	5213	xiao	The detection fragment is smaller than the genome without InDel
b1243	ZB648	xiao	The detection fragment is smaller than the genome without InDel
b1243	Zheng29	xiao	The detection fragment is smaller than the genome without InDel
b1243	TY3	xiao	The detection fragment is smaller than the genome without InDel
b1243	Sy3073	xiao	The detection fragment is smaller than the genome without InDel
b1243	Tian77	xiao	The detection fragment is smaller than the genome without InDel
b1243	GEMS19	xiao	The detection fragment is smaller than the genome without InDel
b1243	TY1	xiao	The detection fragment is smaller than the genome without InDel
b1243	BS16	xiao	The detection fragment is smaller than the genome without InDel
b1243	GEMS31	xiao	The detection fragment is smaller than the genome without InDel
b1243	Zheng35	xiao	The detection fragment is smaller than the genome without InDel
b1243	GEMS3	xiao	The detection fragment is smaller than the genome without InDel
b1243	GEMS14	xiao	The detection fragment is smaller than the genome without InDel
b1243	GEMS32	xiao	The detection fragment is smaller than the genome without InDel
b1243	8902	xiao	The detection fragment is smaller than the genome without InDel
b1243	268	xiao	The detection fragment is smaller than the genome without InDel
b1243	HZS	xiao	The detection fragment is smaller than the genome without InDel
b1243	Wu109	xiao	The detection fragment is smaller than the genome without InDel
b1243	Ry713	xiao	The detection fragment is smaller than the genome without InDel
b1243	Sy1052	xiao	The detection fragment is smaller than the genome without InDel
b1243	CIMBL152	xiao	The detection fragment is smaller than the genome without InDel
b1243	Qi205	xiao	The detection fragment is smaller than the genome without InDel
b1243	CIMBL137	xiao	The detection fragment is smaller than the genome without InDel
b1243	Z2018F	xiao	The detection fragment is smaller than the genome without InDel
b1243	K22	xiao	The detection fragment is smaller than the genome without InDel
b1243	HZS	xiao	The detection fragment is smaller than the genome without InDel
b1243	Dan340	xiao	The detection fragment is smaller than the genome without InDel
b1243	CML122	yes
b1243	CIMBL70	yes
b1243	CIMBL94	yes
b1243	CIMBL141	yes
b1243	CML139	yes
b1243	CIMBL95	yes
b1243	CIMBL42	yes
b1243	By815	yes
b1243	Zheng653	yes
b1243	Dan3130	yes
b1243	GEMS29	yes
b1243	4F1	yes
b1243	By4960	yes
b1243	IRF314	yes
b1243	GEMS63	yes
b1243	By809	yes
b1243	GEMS62	yes
b1243	By855	yes
b1243	Gy462	yes
b1243	07KS4	yes
b1243	238	yes
b1243	JH59	yes
b1243	W138	yes
b1243	By813	yes
b1243	Gy798	yes
b1243	Mo17	yes
b1243	Zong31	yes
b1243	CIMBL10	no
b1243	CIMBL40	no
b1243	CML121	no
b1243	CML69	no
b1243	CIMBL75	no
b1243	CIMBL28	no
b1243	CIMBL151	no
b1243	CML423	no
b1243	CML361	no
b1243	CML170	no
b1243	CIMBL74	no
b1243	CML172	no
b1243	CIMBL43	no
b1243	CML324	no
b1243	CML189	no
b1243	CML192	no
b1243	150	no
b1243	975-12	no
b1243	Zheng30	no
b1243	By4839	no
b1243	GEMS5	no
b1243	05WN230	no
b1243	L3180	no
b1243	GEMS21	no
b1243	Gy386	no
b1243	GEMS37	no
b1243	GEMS64	no
b1243	B110	no
b1243	GEMS18	no
b1243	Liao5263	no
b1243	By4944	no
b1243	GEMS11	no
b1243	Si273	no
b1243	Ji846	no
b1243	B73	no
b1243	CI7	no
